# Supplementary material for: Genome‐Wide Associations of Global Electrical Heterogeneity ECG Phenotype: The ARIC (Atherosclerosis Risk in Communities) Study and CHS (Cardiovascular Health Study)
Source: PubMed Central journal article supplement — J Am Heart Assoc. 2018 Apr 5;7(8):e008160. doi: 10.1161/JAHA.117.008160 (PMC6015433; doi:10.1161/jaha.117.008160), 2018-04-05
Supplement: JAH3-7-e008160-s004.pdf [file JAH3-7-e008160-s004.pdf]

# **SUPPLEMENTAL MATERIAL**

**Table S1. Genotyping and imputation of the genetic data.** See Excel file.

**Table S2. Adjustment for QRS, PR, QT, and RR' intervals.** See Excel file.

**Table S3. Functional characteristics of GEH-associated SNPs.** See Excel file.
